# Supplementary material
Source: PubMed Central journal article supplement (PMC6015476)
Supplement: NIHMS915218-supplement-1.pdf [file NIHMS915218-supplement-1.pdf]

# HMGA2 IHC

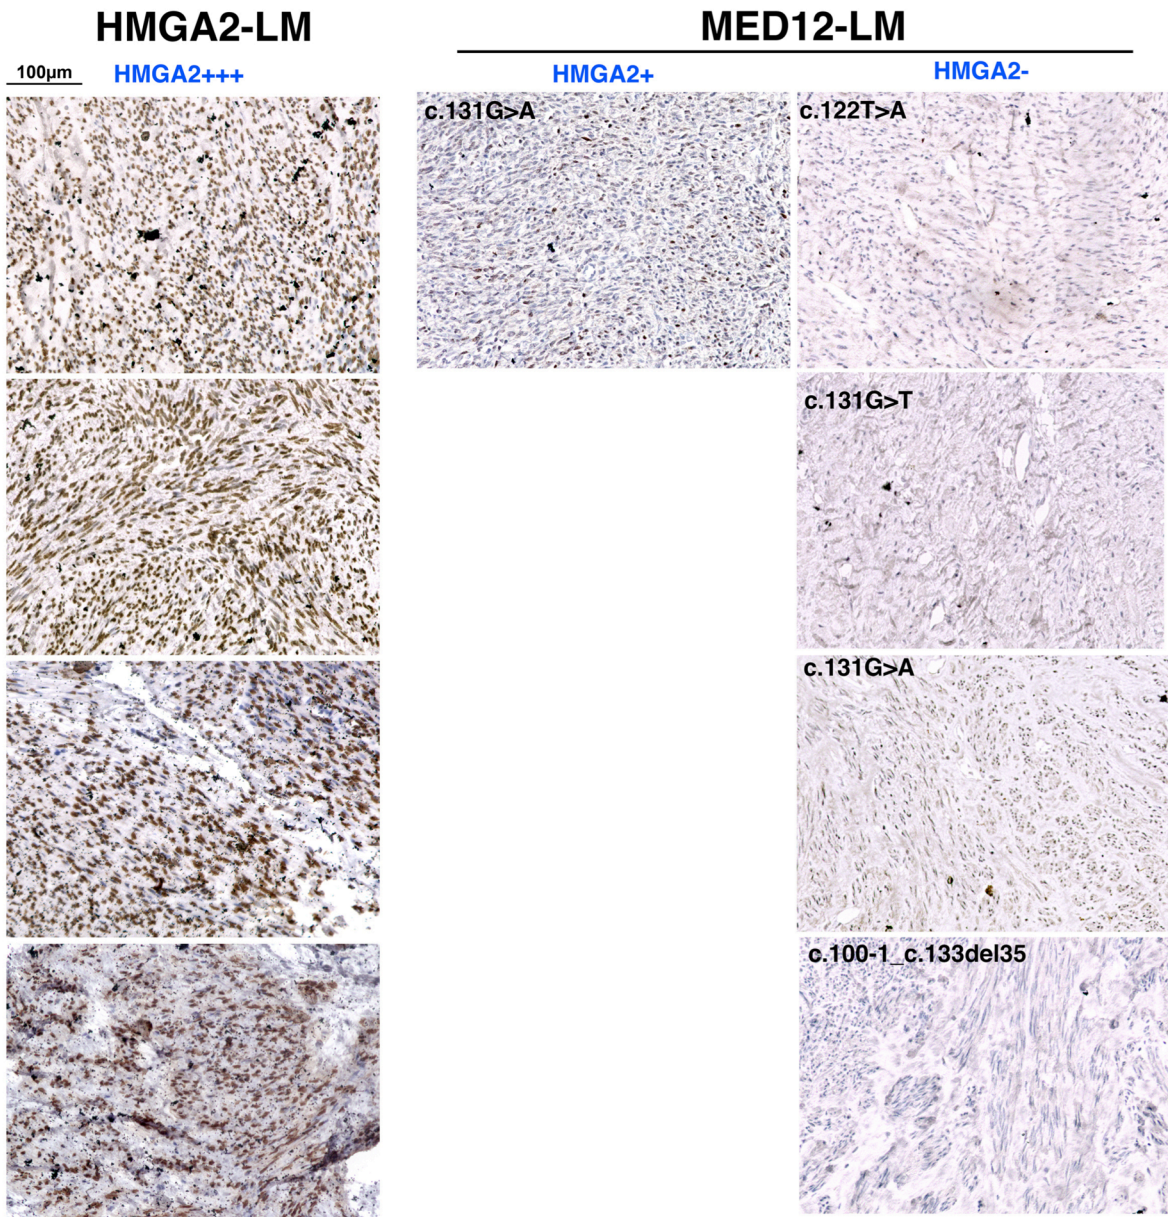

## Supplemental Figure S1. IHC screening for HMGA2 in LM cases.

Representative HMGA2 IHC images of LMs. In a MED12-LM, a moderate signal for HMGA2 was detected in a subpopulation of SMCs. Other MED12-LMs were totally negative for HMGA2.
