# Supplementary material
Source: PubMed Central journal article supplement (PMC6015476)
Supplement: NIHMS915218-supplement-2.pdf [file NIHMS915218-supplement-2.pdf]

| <i>MED12</i> mutation | Protein              | Sample ID | SMC%  |
|-----------------------|----------------------|-----------|-------|
| c.107T>G              | p.L36R               | 16-0538   | 59.51 |
| c.130G>A              | p.G44S               | 16-1714   | 72.12 |
| c.130G>A              | p.G44S               | 16-0213   | 53.85 |
| c.130G>A              | p.G44S               | 16-0541   | 60.76 |
| c.130G>A              | p.G44S               | 16-1479   | 61.71 |
| c.130G>C              | p.G44R               | 16-0220   | 31.39 |
| c.130G>C              | p.G44R               | 13-0198   | 67.44 |
| c.130G>T              | p.G44C               | 16-0539   | 58.65 |
| c.131 G>T             | p.G44V               | 16-1482   | 66.25 |
| c.131G>A              | p.G44D               | 12-0660   | 45.35 |
| c.131G>A              | p.G44D               | 16-2264   | 76.71 |
| c.131G>A              | p.G44D               | 16-0542   | 40.16 |
| c.131G>A              | p.G44D               | 16-0759   | 56.88 |
| c.131G>A              | p.G44D               | 13-0185   | 76.48 |
| c.131G>A              | p.G44D               | 12-0253   | 65.23 |
| c.131G>A              | p.G44D               | 12-0254   | 65.53 |
| c.131G>A              | p.G44D               | 12-2202   | 69.00 |
| c.131G>C              | p.G44A               | 12-0657   | 55.52 |
| c.131G>T              | p.G44V               | 16-0219   | 51.59 |
| c.131G>T              | p.G44V               | 16-0222   | 55.37 |
| c.131G>T              | p.G44V               | 16-1474   | 71.85 |
| c.120_149del30        | p.K42_V51del10       | 16-0229   | 56.49 |
| c.100-69_107del77     | Splice acceptor site | 16-0211   | 61.91 |
| c.100-41_132 del74    | Splice acceptor site | 16-0543   | 57.54 |
| c.100-1_c.133del35    | Splice acceptor site | 16-0228   | 66.03 |

**Table S1. *MED12*-LM cases used for SMC concentration analysis.**
