# Supplementary material
Source: PubMed Central journal article supplement (PMC6015476)
Supplement: NIHMS915218-supplement-3.pdf [file NIHMS915218-supplement-3.pdf]

|                                       | Sample Name                             |
|---------------------------------------|-----------------------------------------|
| <span style="color: green;">—</span>  | Specimen 1:100                          |
| <span style="color: orange;">—</span> | Specimen 1:50                           |
| <span style="color: blue;">—</span>   | Specimen 1:25                           |
| <span style="color: red;">—</span>    | Compensation Controls APC Stained Co... |

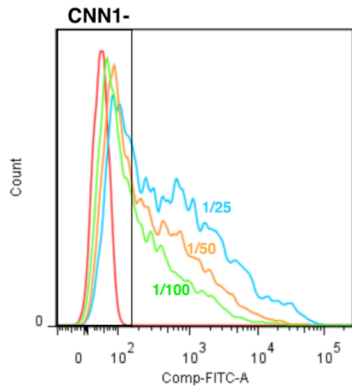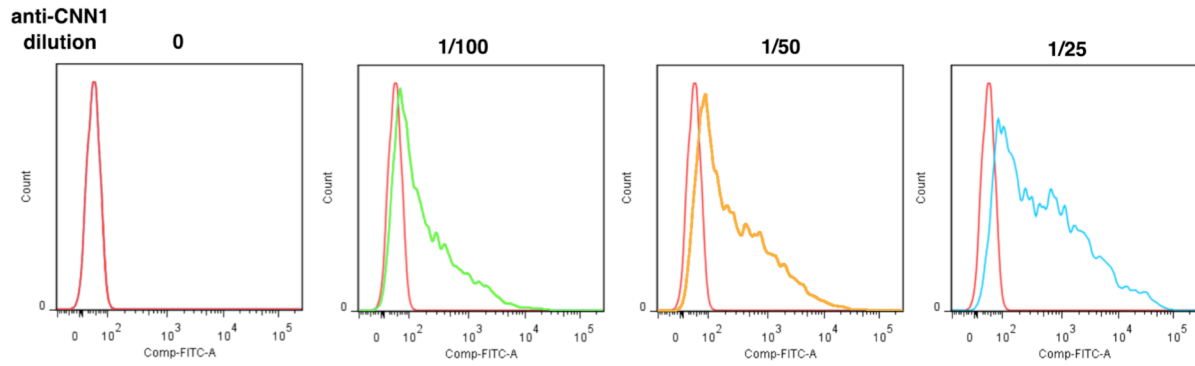

**Supplemental Figure S2. Anti-Calponin IgG dilution test for FACS analysis.**

CLP antibody was titrated for FACS analysis of LMs. The shift of the peak for CLP-negative cells indicates the presence of non-specific binding of the antibody. Based on this result, the anti-CLP antibody was used at 1:25 dilution.
