# Supplementary material
Source: PubMed Central journal article supplement (PMC6015476)
Supplement: NIHMS915218-supplement-4.pdf [file NIHMS915218-supplement-4.pdf]

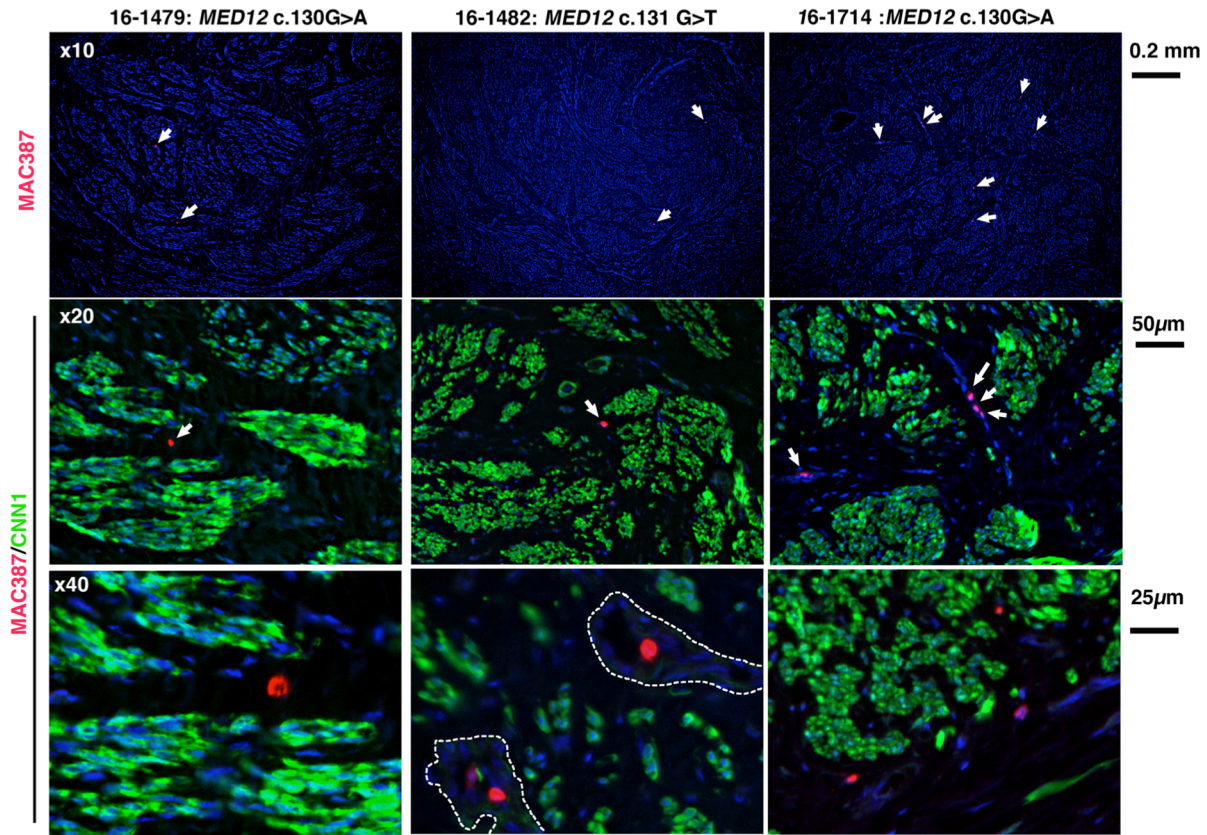

**Supplemental Figure S3. IF assay for MAC387 in MED12-LMs.**

Distribution of MAC387- positive cells in MED12-LMs. The concentration of MAC387-positive cells varied between samples, but the number of positive cells were relatively rare and concentrated in perivascular areas. The blood vessels were outlined by dotted lines.
