# Supplementary material
Source: PubMed Central journal article supplement (PMC6015476)
Supplement: NIHMS915218-supplement-5.pdf [file NIHMS915218-supplement-5.pdf]

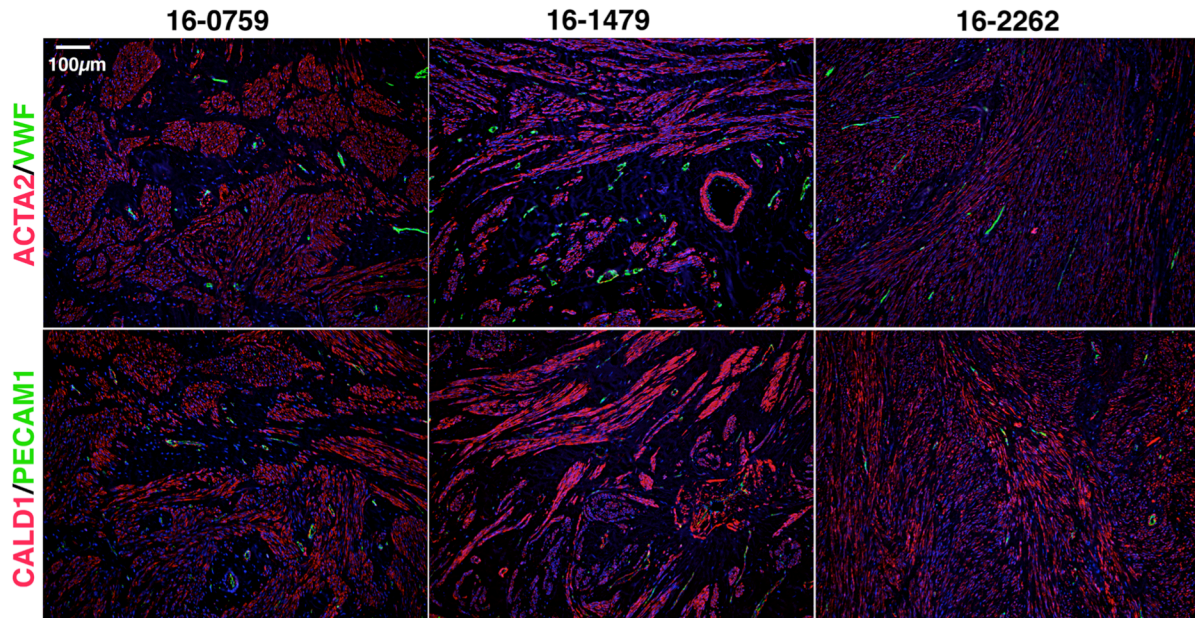

**Supplemental Figure S4. IF assay for endothelial cells in MED12-LMs.**

Distribution of endothelial cells in MED12-LMs was assessed by IF for PECAM1 and VWF. The concentration of endothelial cells varied between LMs.
